# Supplementary material
Source: PubMed Central journal article supplement (PMC5774245)

## SUPPLEMENTAL FIGURE LEGENDS

**Fig.S1. Shh expression increases during dexamethasone treatment.**  $\beta$ -galactosidase activity staining in *Shh-LacZ* reporter mice shows that *Shh* expression increase (in blue) is present after 7 days of dexamethasone treatment (left panel), and its expansion is greater after 10 days of dexamethasone treatment (right panel). Scale bar: 200  $\mu$ m.

**Fig.S2. Steroidogenic properties of cortical *Gli1* descendants.** The *Gli1*-descendants (green) migrating into the cortex have steroidogenic properties as shown by red cytoplasmic SCC staining. Scale bars: 200  $\mu$ m.

**Fig.S3. A. Efficacy of GANT61 treatment in adrenal glands.** *Gli1-LacZ* reporter mice treated with GANT61 showed diminished  $\beta$ -galactosidase activity (in blue) in the adrenal capsule compared to vehicle-treated mice. GANT61 targets GLI, interfering with DNA binding of GLI1. Scale bar: 200  $\mu$ m. **B.** Corticosterone measurement of GANT61- and vehicle-treated mice. **C.** Relative mRNA quantification of *Gli1* and *Shh* after LDE225 treatment compared to vehicle alone. **D.** Corticosterone measurement of LDE225- and vehicle-treated mice. Error bars represented as mean  $\pm$ s.e.m.. \* $p$ <0.05, \*\* $p$ <0.01 and \*\*\* $p$ <0.001.

**Fig.S4. Adrenal weights normalized to body weight of control mice and *SmoM2* mice after dexamethasone treatment.** No statistically significant differences were observed with non-parametric Mann-Whitney test. Error bars represented as mean  $\pm$ s.e.m..

**Fig.S5. Cortical WNT-responsive cells increase during dexamethasone treatment.** After 7 days of dexamethasone treatment, immunofluorescence staining of adrenals from *WntGFP* mice revealed an increase in WNT-responsive cells labeled by green nuclear staining (left panel). This increase is greater after 10 days of dexamethasone treatment (right panel). Nuclei labeled in blue (DAPI). Scale bar = 200 $\mu$ m.

**Fig.S6. A.** Co-localization of *Axin2*-expressing cells and *Axin2* descendants (EGFP+, green) and  $\beta$ -catenin (in red) 3 days after tamoxifen injection. Scale bar: 200  $\mu$ m. **B.** Agarose gel showing  $\beta$ -catenin allele excision after tamoxifen administration. The image has been cropped to remove superfluous (empty) lanes.

Supplemental Fig.1

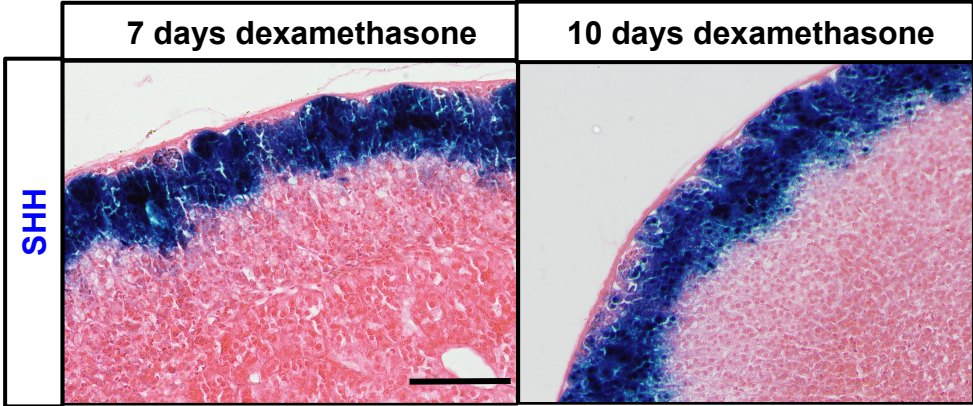

Supplemental Fig.2

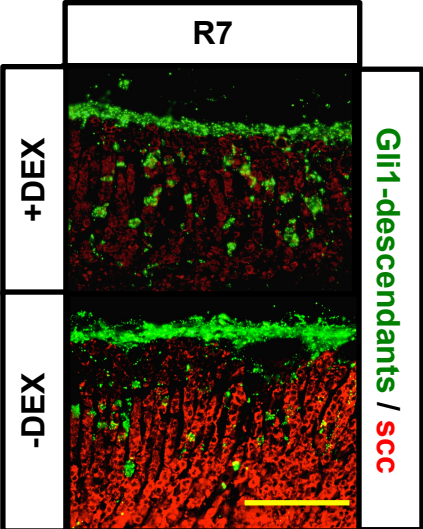

A

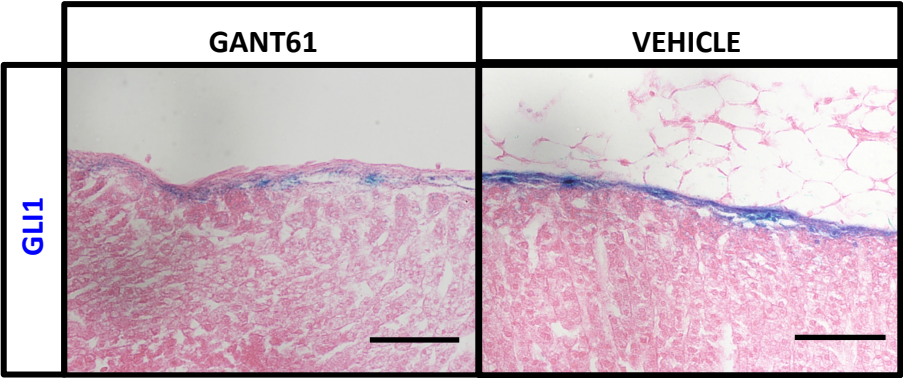

B

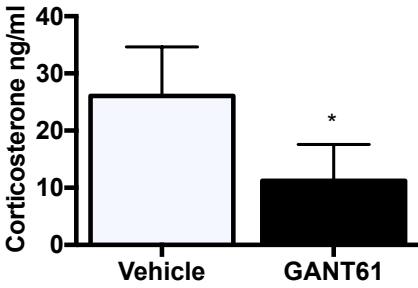

C

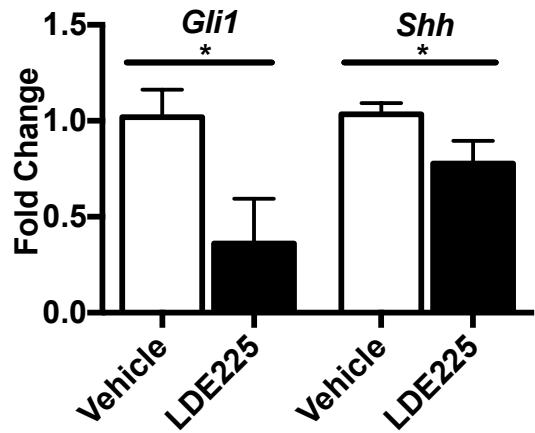

D

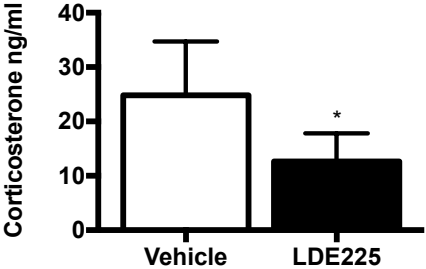



Supplemental Fig.4

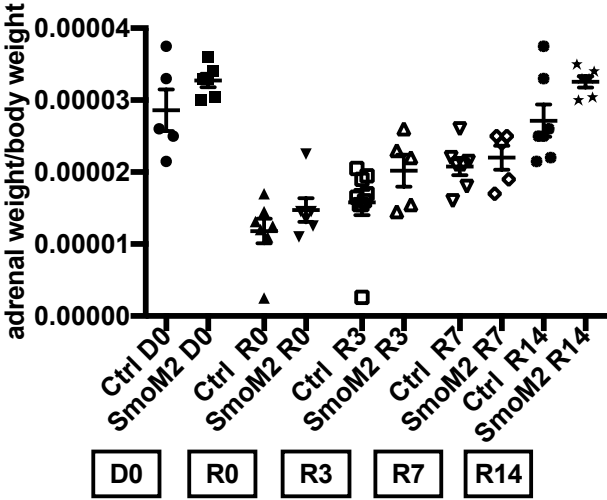

Supplemental Fig.5

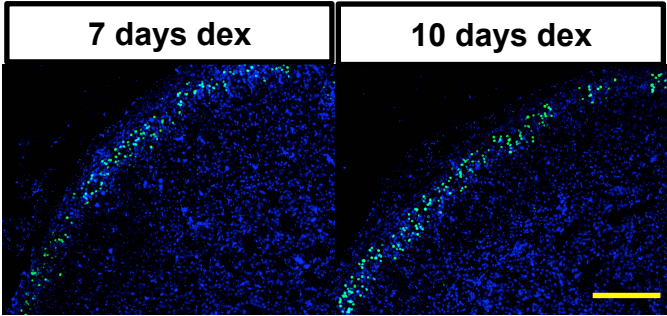

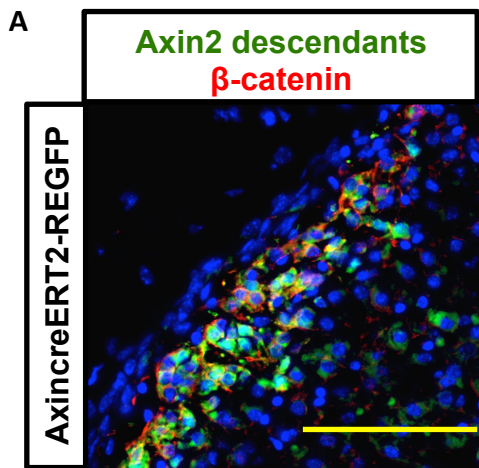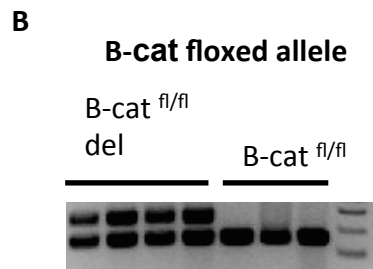

Supplement: en-159-579-sf1.pdf [file en-159-579-sf1.pdf]
